# Supplementary material for: Description and ontogeny of a 40-million-year-old parasitic isopodan crustacean:Parvucymoides dvorakorumgen. et sp. nov.
Source: PeerJ journal article supplement (doi:10.7717/peerj.12317), 2021-12-09

# Mean shapes of immatures, males and females, with euclidean distance between immatures and adult females (colour band)

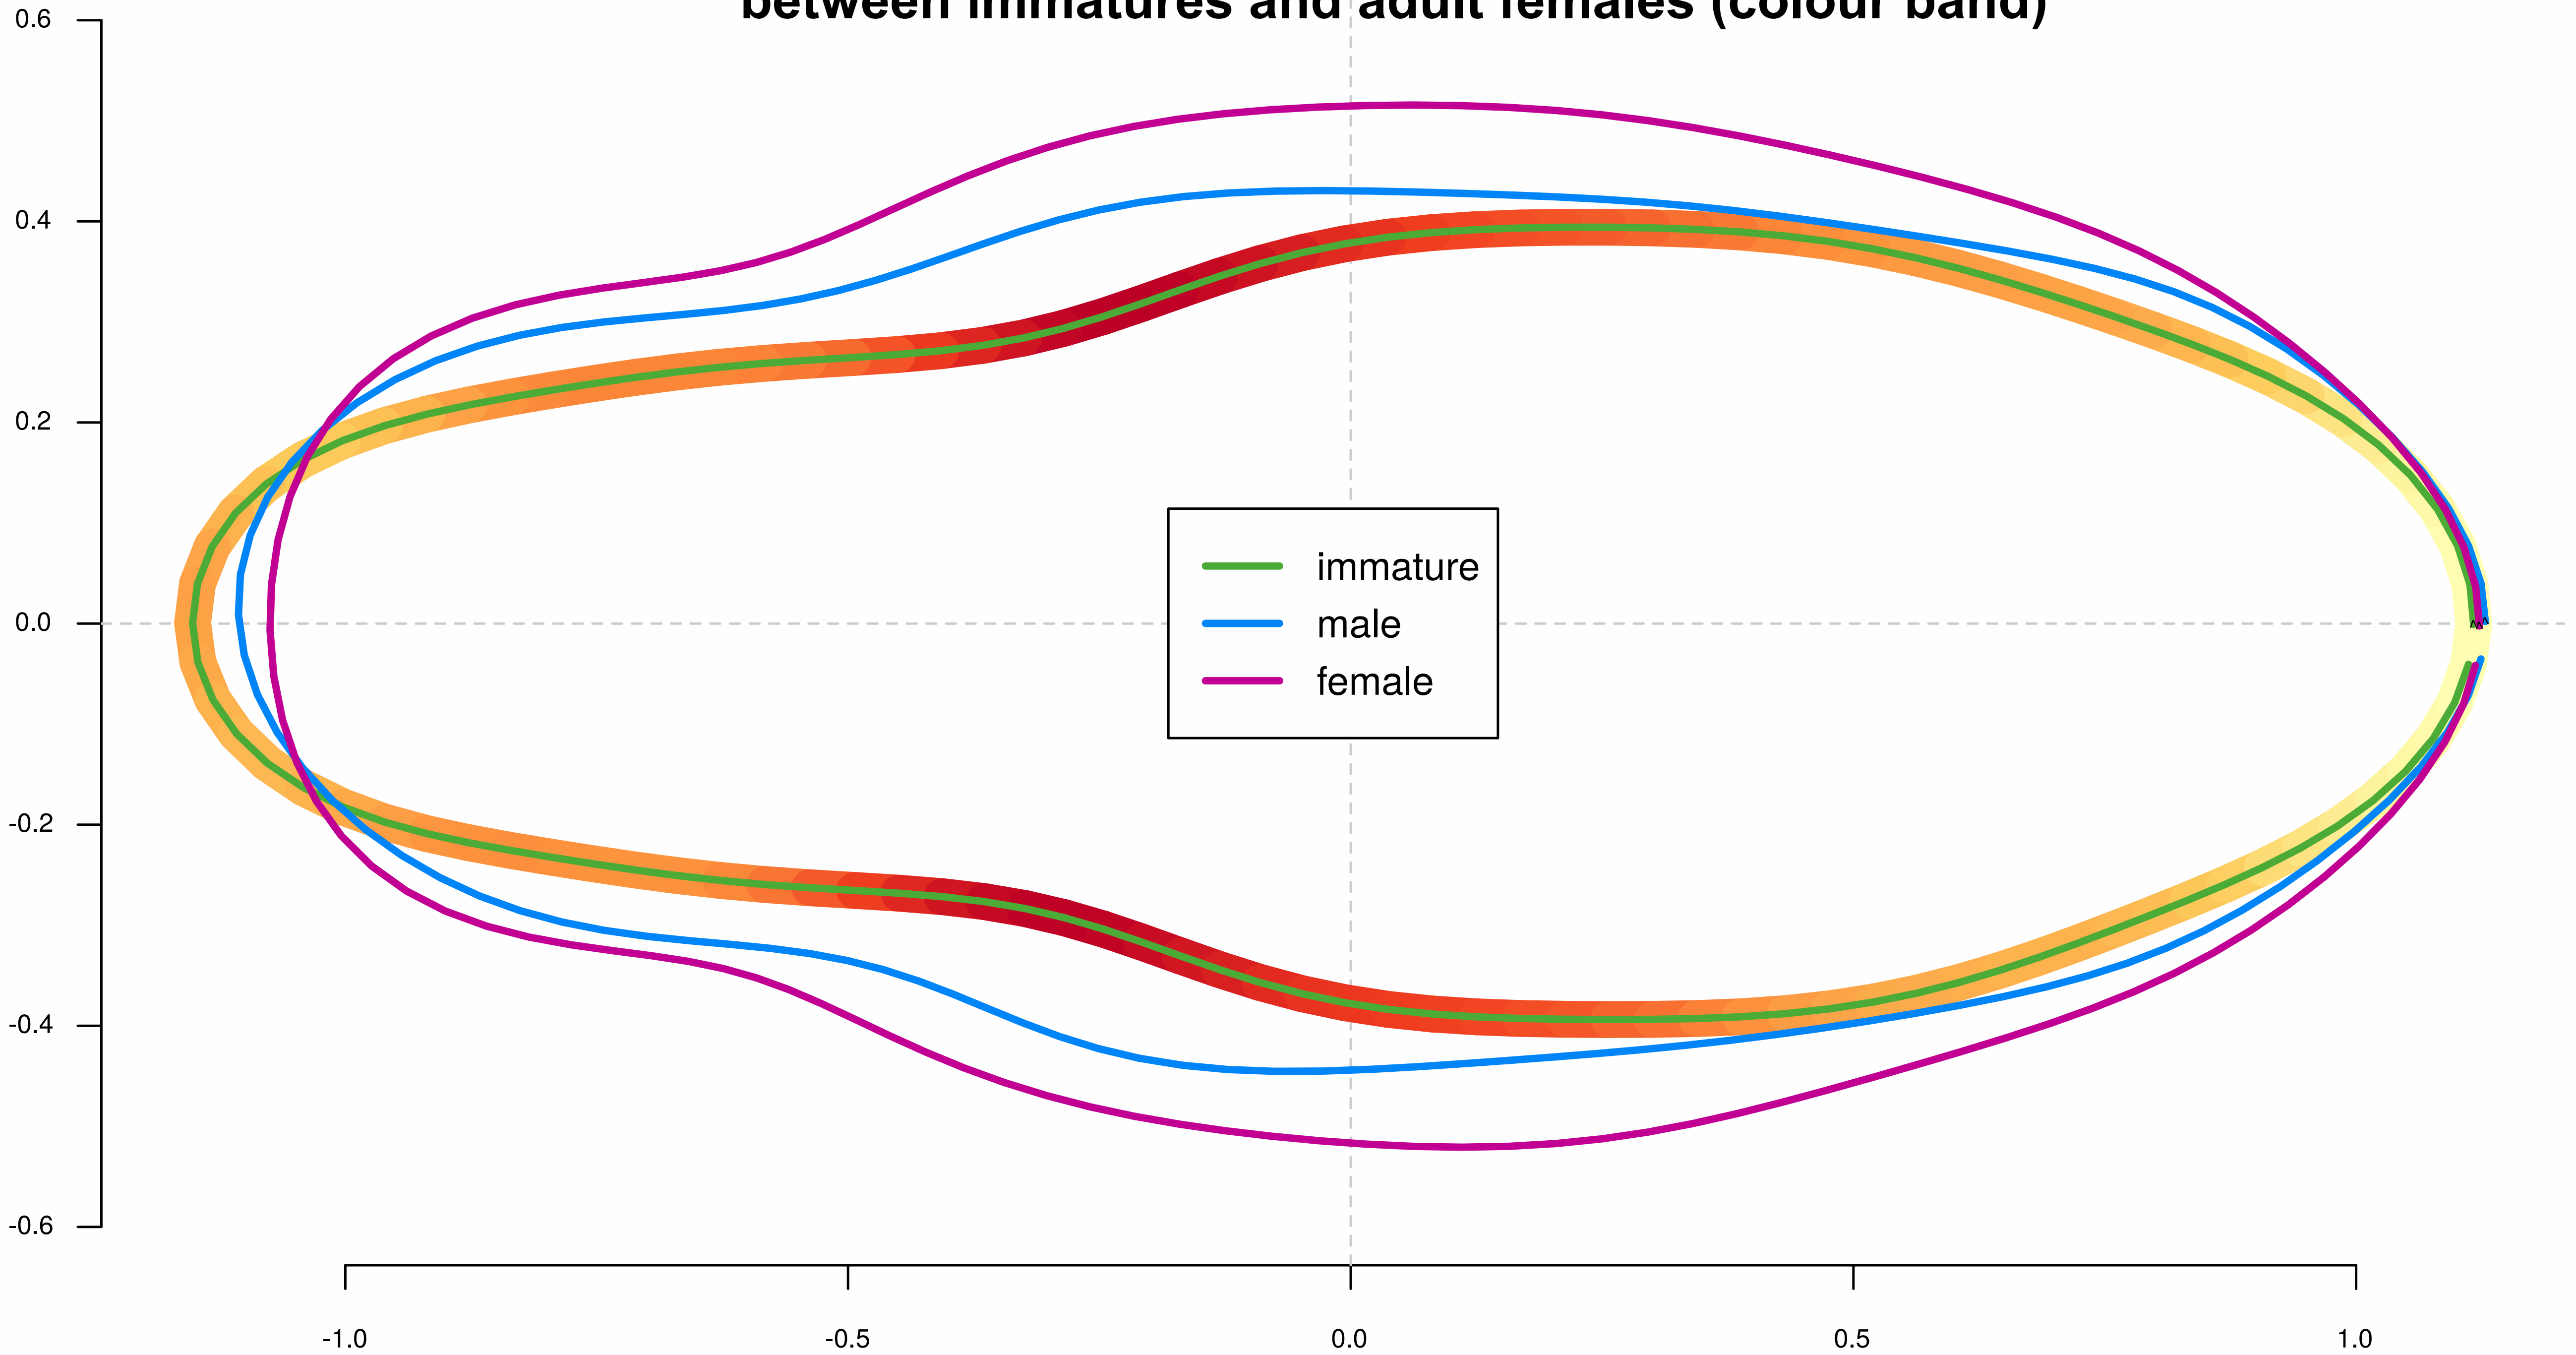

Supplement: Supplemental_Fig._2.pdf [file Supplemental_Fig._2.pdf]
